# Supplementary material for: Nuclear membrane ruptures underlie the vascular pathology in a mouse model of Hutchinson-Gilford progeria syndrome
Source: PubMed Central journal article supplement (PMC8409987; doi:10.1172/jci.insight.151515), 2021-08-23

## Supplementary Materials

### **Nuclear membrane ruptures underlie the vascular pathology in a mouse model of Hutchinson-Gilford progeria syndrome**

Materials and Methods.

Fig. S1. Progerin causes NM ruptures in SMCs.

Fig. S2. Disrupting the LINC complex reduces NM ruptures in Prog-SMCs.

Fig. S3. Nonfarnesylated progerin is bound less tightly to nuclear membranes.

Fig. S4. Lamin B1 decreases nuclear stiffness.

Fig. S5. Progerin and lamin B1 proteins levels change with age in the aorta of *Lmna*<sup>G609G/+</sup> mice.

Fig. S6. NM ruptures in SMCs of the ascending thoracic aorta.

Fig. S7. NM ruptures and intranuclear membranous tubules in aortic SMCs of *Lmna*<sup>G609G/+</sup> mice.

Table S1. Antibodies used for western blotting and immunohistochemistry.

Table S2. Quantitative RT-PCR primers.

Table S3. Plasmid constructs.

## Supplementary Materials and Methods

**Dox-inducible expression of lamin B1 in mouse embryonic fibroblasts (MEFs).** MEFs were transduced with the pTRIPZ-*Lmnb1* construct by UCLA's Vector Core. Transduced cells were selected with 3 $\mu$ g/ml puromycin for two weeks; clones were isolated by limiting dilution.

**Quantitative real time-PCR.** Total RNA was isolated and treated with DNase I (Ambion) according to the manufacture's recommendation. RNA was reverse-transcribed with random primers with SuperScript III cDNA Synthesis Kit (Invitrogen). cDNA samples were diluted in nuclease-free water and stored at  $-80^{\circ}$  C. RT-PCR reactions were performed on a 7900 Fast Real-Time PCR system (Applied Biosystems) with SYBR Green PCR Master Mix (Bioline). Transcript levels were calculated by the comparative cycle threshold method and normalized to cyclophilin A expression. All oligonucleotide primers are listed in Table S2.

**Western blotting.** Urea-soluble protein extracts from cells and tissues were prepared as described (12). Proteins were size-fractionated on 4–12% gradient polyacrylamide Bis-Tris gels (Invitrogen) and transferred to nitrocellulose membranes. The membranes were blocked with Odyssey Blocking solution (LI-COR Bioscience, Lincoln, NE) for 1 h at RT and incubated with primary antibodies at  $4^{\circ}$  C overnight. After washing the membranes with PBS containing 0.2% Tween-20, they were incubated with infrared dye (IR)-labeled secondary antibodies at RT for 1 h. The IR signals were quantified with an Odyssey infrared scanner (LI-COR Biosciences). The antibodies and concentrations are listed in Table S1.

**Immunofluorescence microscopy.** Cells on coverslips or tissue sections (6–10- $\mu$ m-thick) on glass slides were fixed with 4% paraformaldehyde in PBS and permeabilized with 0.2% Triton. The cells were processed for immunofluorescence microscopy as (12). The antibodies and antibody concentrations are listed in Table S1. Confocal fluorescence microscopy images were

obtained with a Zeiss LSM 800 laser-scanning microscope and images along the z-axis were processed by Zen Blue 2.3 software to generate maximum image projections.

**Electron microscopy.** Mice were perfused *in situ* with PBS followed by ice-cold fixative (2.5% glutaraldehyde, 3% paraformaldehyde in PBS). Tissue samples were processed as described previously (12). Images were acquired with an FEI T12 transmission electron microscope set to 120 kV accelerating voltage and a Gatan 2K × 2K digital camera (Electron Imaging Center).

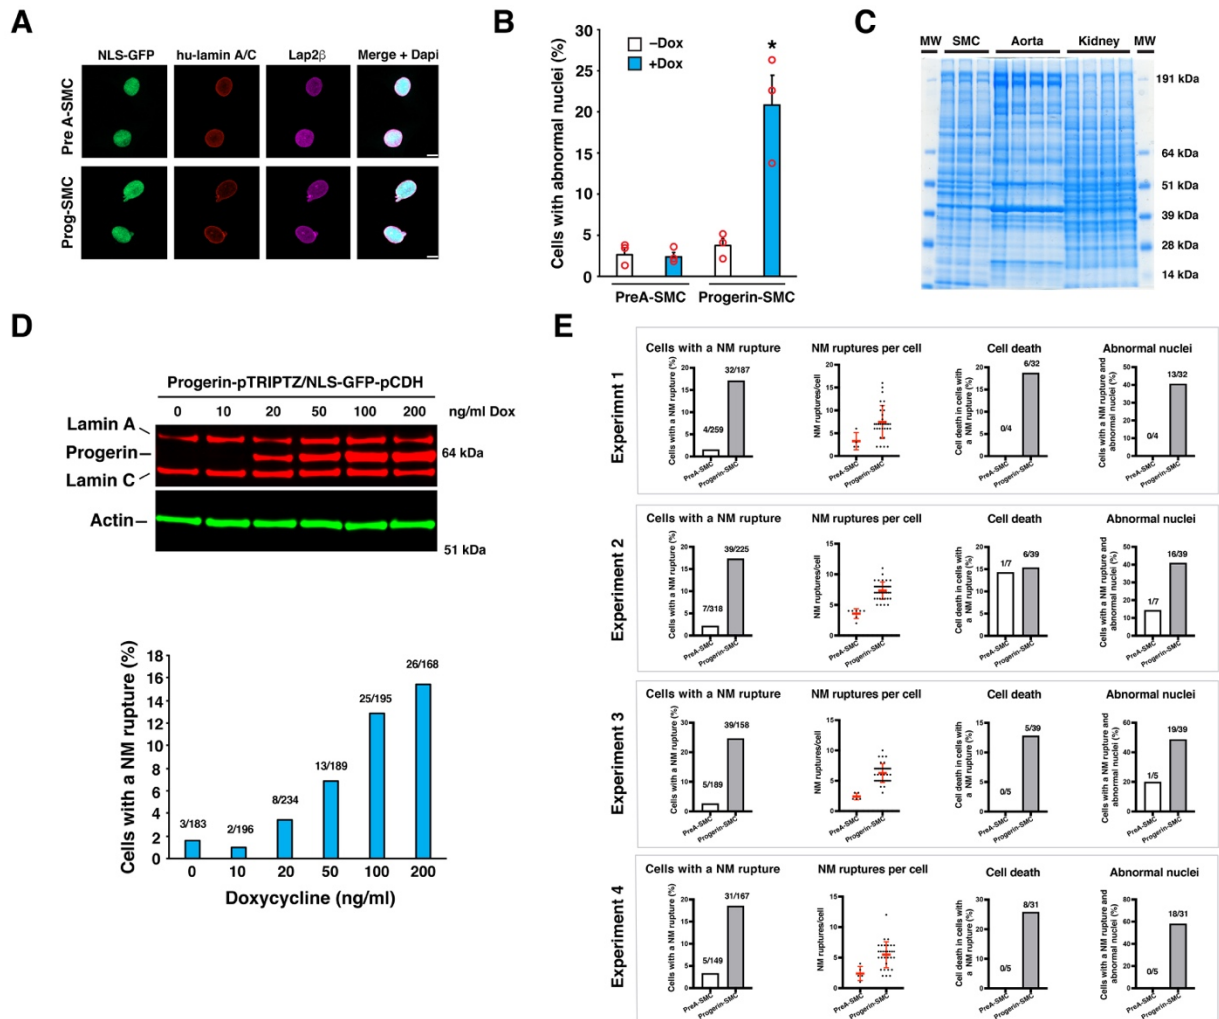

**Fig. S1. Progerin causes NM ruptures in SMCs.** (A) Confocal fluorescence microscopy images showing the expression of human prelamin A and human progerin in SMCs that express Nuc-GFP (green). Cells were stained with antibodies against human lamin A (red) and lap2 $\beta$  (magenta); nuclei were stained with Dapi (blue). Scale bar, 10  $\mu$ m. (B) Bar graph showing that progerin increases abnormally shaped nuclei in fixed SMCs (mean  $\pm$  SEM,  $n = 3$  experiments;  $t$ -test,  $*p < 0.02$ ). Progerin and prelamin A expression (blue) were induced with doxycycline (Dox). Red circles show the average values in individual experiments. (C) Coomassie Blue-stained SDS-PAGE gel used to quantify total protein for the western blot in Figure 1A. MW, molecular weight. (D) Progerin causes a dose-dependent increase in NM ruptures in SMCs. (Top) Western blot showing increasing progerin expression with increasing amounts of Dox. Actin was measured as a loading control. (Bottom) Bar graph showing dose-dependent increase in NM ruptures in SMCs. The ratios above each bar show the numbers of cells with a NM rupture over the total number of cells examined. (E) Characterization of NM ruptures in PreA-SMCs and Progerin-SMCs, as judged by time-lapse microscopy ( $n = 4$  experiments). Bar graphs show the percentage of cells with a NM rupture; the number of NM ruptures per cell; the percentage of cells with a NM rupture that die; and the percentage of cells with a NM rupture and abnormal shaped nuclei. A total of 915 PreA-SMCs and 735 Prog-SMCs were analyzed.

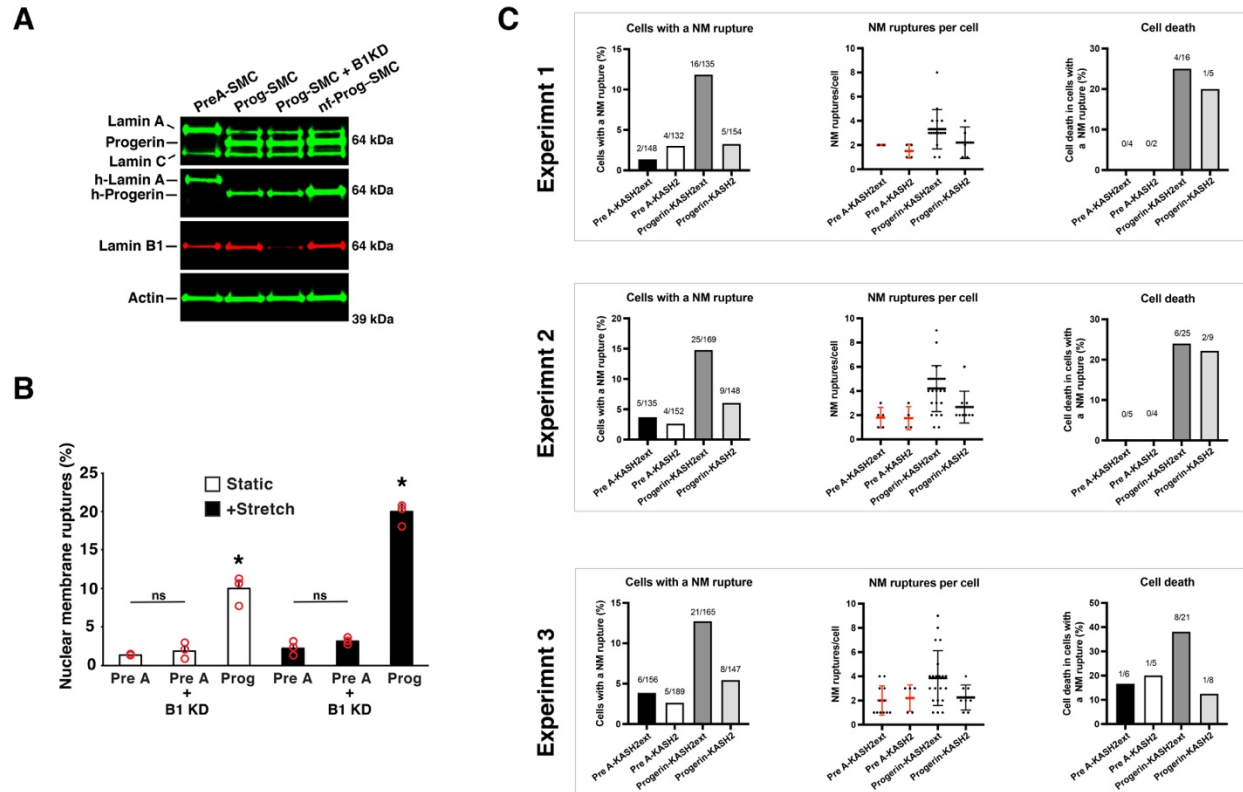

**Fig. S2. Disrupting the LINC complex reduces NM ruptures in Prog-SMCs.** (A) Western blot showing the expression of prelamin A, progerin, and nonfarnesylated progerin (all human) in SMCs, and the effects of lamin B1 siRNA knockdown (B1KD) in Prog-SMCs. Actin was measured as a loading control. (B) Bar graph showing that lamin B1 knockdown (B1 KD) does not increase NM ruptures in PreA-SMCs under either static (*white bars*) or stretched (*black bars*) conditions. Values compared to NM ruptures in static PreA-SMCs (mean  $\pm$  SEM,  $n = 3$  experiments; two-way ANOVA,  $*p < 0.0001$ ). ns, non-significant. *Red circles* show average values in individual experiments. (C) Characterization of NM ruptures in PreA-SMC and Prog-SMCs in the presence of either KASH2 or KASH2ext, as judged by time-lapse microscopy ( $n = 3$  experiments). Bar graphs show the percentage of cells with a NM rupture; the number of NM ruptures per cell; and the percentage of cells with a NM rupture that die. The total number of cells scored in each experiment is shown in the bar graph on the left.

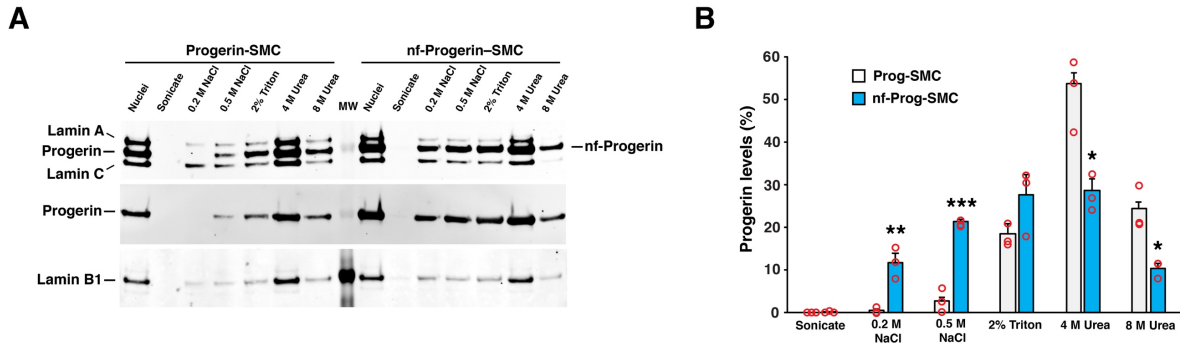

**Fig. S3. Nonfarnesylated progerin is bound less tightly to nuclear membranes.** (A) Western blot showing the extraction profiles for progerin and nonfarnesylated progerin expressed in SMCs. Nuclei isolated from Prog-SMCs and nf-Prog-SMCs were sequentially extracted with 0.2 M NaCl, 0.5 M NaCl, 2% Triton, 4 M urea, and 8 M urea. The supernatants from each extraction were analyzed by western blotting with antibodies against lamin A/C (to detect all A-type lamins), human lamin A (to detect progerin and nf-progerin), and lamin B1. (B) Bar graph comparing the extraction profiles for progerin (white) and nf-progerin (blue) (mean  $\pm$  SEM,  $n = 3$  experiments;  $t$ -test,  $*p < 0.02$ ,  $**p < 0.01$ ,  $***p < 0.001$ ). Red circles show average values in individual experiments.

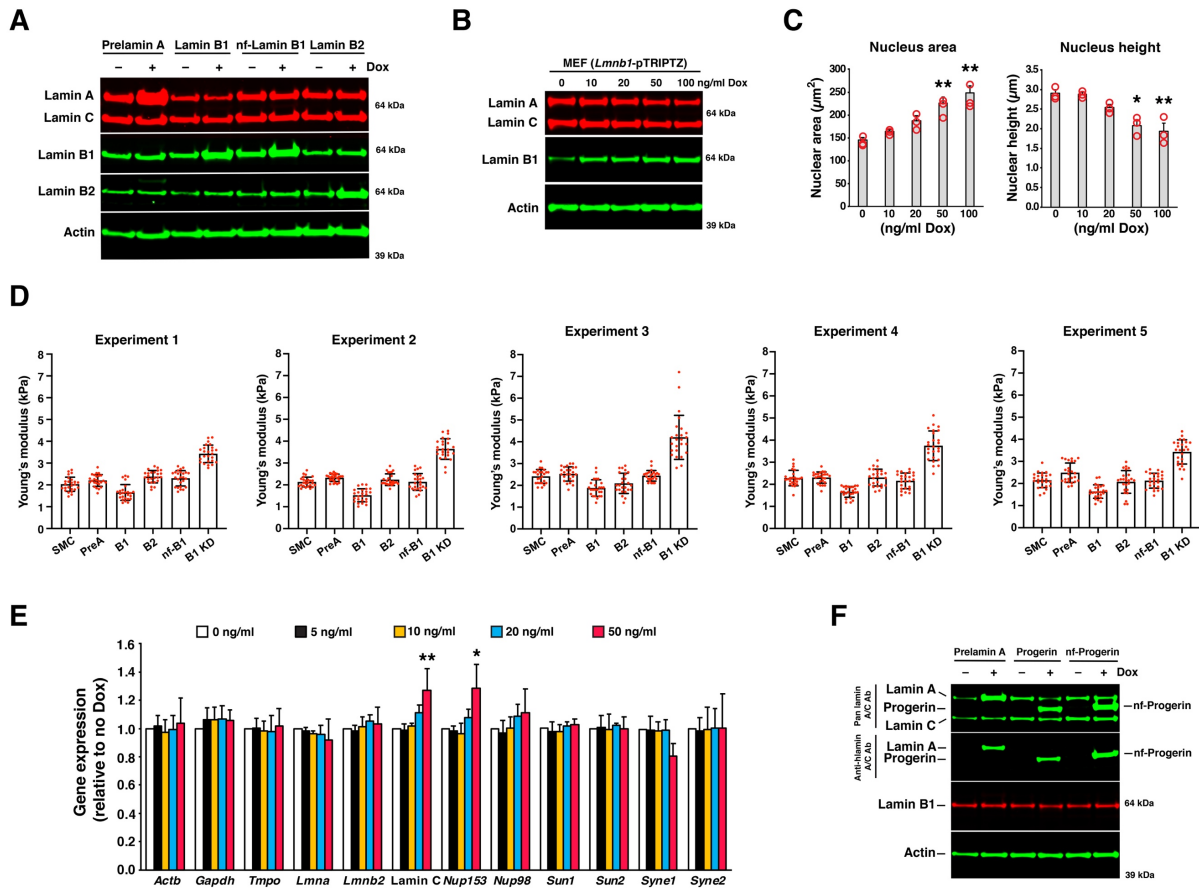

**Fig. S4. Lamin B1 decreases nuclear stiffness.** (A) Western blot showing the expression of prelamin A, lamin B1, nonfarnesylated lamin B1 (nf-lamin B1), and lamin B2 in SMCs. Lamin expression was induced with Dox. Actin levels were measured as a loading control. (B) Western blot showing inducible expression of lamin B1 in mouse embryonic fibroblasts (MEFs). Lamin B1 expression was induced with Dox. Actin levels were measured as a loading control. (C) Bar graphs showing the effects of lamin B1 on nuclear size in MEFs. Lamin B1 expression was induced in adherent MEFs with Dox (0–100 ng/ml) for 48 h. The cells were imaged by confocal fluorescence microscopy, and the nucleus area and height determined (mean  $\pm$  SEM,  $n = 3$  experiments; ANOVA,  $*p < 0.01$ ,  $**p < 0.002$ ). Red circles show the average values for independent experiments. (D) The effects of prelamin A (PreA), lamin B1 (B1), lamin B2 (B2), nf-lamin B1 (nf-B1), and lamin B1 knockdown (B1 KD) on nuclear stiffness in SMCs were measured by AFM 48 h after changing nuclear lamin expression. Each red dot represents an individual cell. Twenty-five cells were examined for each group. Mean  $\pm$  SD. (E) Bar graph comparing the effects of lamin B1 expression on gene expression (mean  $\pm$  SEM,  $n = 3$  experiments). Comparisons made to SMCs not induced with Dox (white bar); ANOVA,  $*p < 0.02$ ,  $**p < 0.01$ . (F) Western blot showing the expression of human prelamin A, human progerin, and human nonfarnesylated–progerin (nf-Progerin) in SMCs. A “pan lamin AC antibody” was used to detect mouse and human A-type lamins; a human lamin A–specific antibody was used to detect human lamin A and progerin. Actin was measured as a loading control.

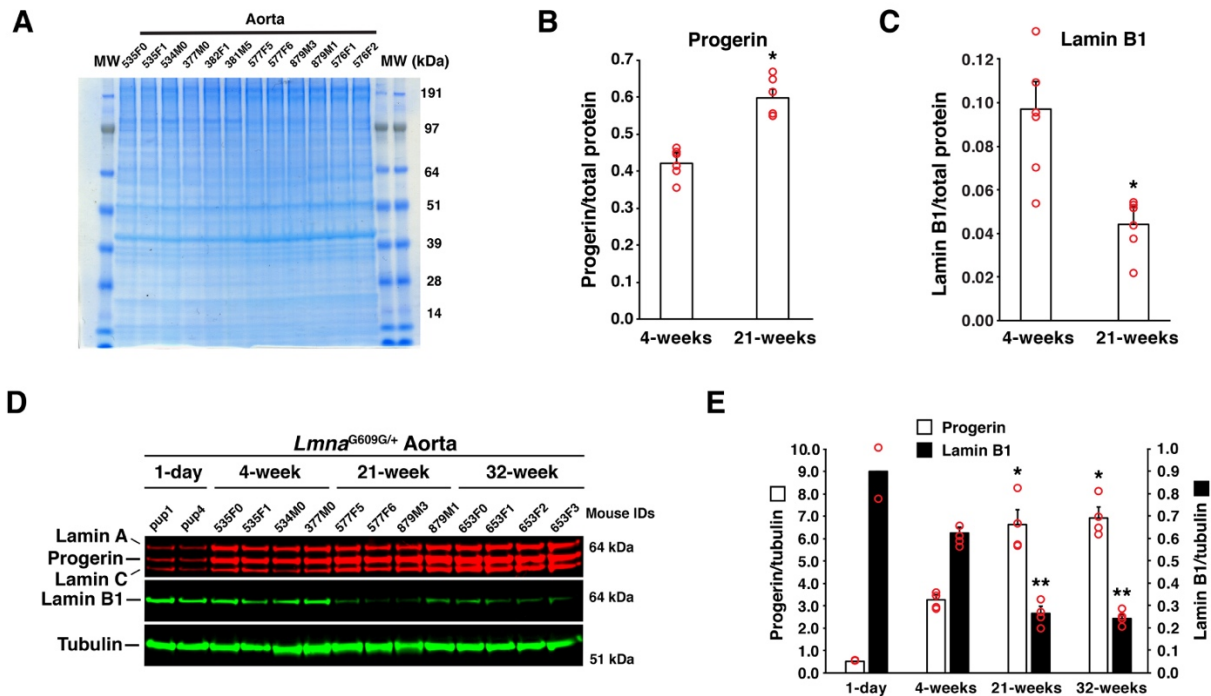

**Fig. S5. Progerin and lamin B1 proteins levels change with age in the aorta of *Lmna*<sup>G609G/+</sup> mice.** (A) Coomassie Blue–stained gel corresponding to the western blot in Figure 5A. MW, molecular weight. (B) Bar graph showing progerin levels, relative to total protein, for the western blot in Figure 5A (mean ± SEM,  $n = 6$  mice/group;  $t$ -test,  $*p < 0.001$ ). Red circles show values for individual animals. (C) Bar graph showing lamin B1 levels, relative to total protein, for the western blot in Figure 5A (mean ± SEM,  $n = 6$  mice/group;  $t$ -test,  $*p < 0.005$ ). Red circles show values for individual animals. (D) Western blot comparing the expression of progerin and lamin B1 in the aorta from 1-day-old, and 4-, 21-, and 32-week-old *Lmna*<sup>G609G/+</sup> mice. Thoracic aortas (2 or 4 mice per group) were extracted and analyzed as described in Figure 5A. IDs are shown above each sample. (E) Bar graph showing the expression of progerin (white bars) and lamin B1 (black bars), relative to tubulin, for the western blot in panel D. Shown are mean ± SEM ( $n = 4$  mice/group), except for the 1-day old mice ( $n = 2$ ). The values for the 21- and 32-week-old mice are compared to 4-week-old mice by ANOVA ( $*p < 0.001$ ,  $**p < 0.0001$ ). Red circles show the values for individual animals.



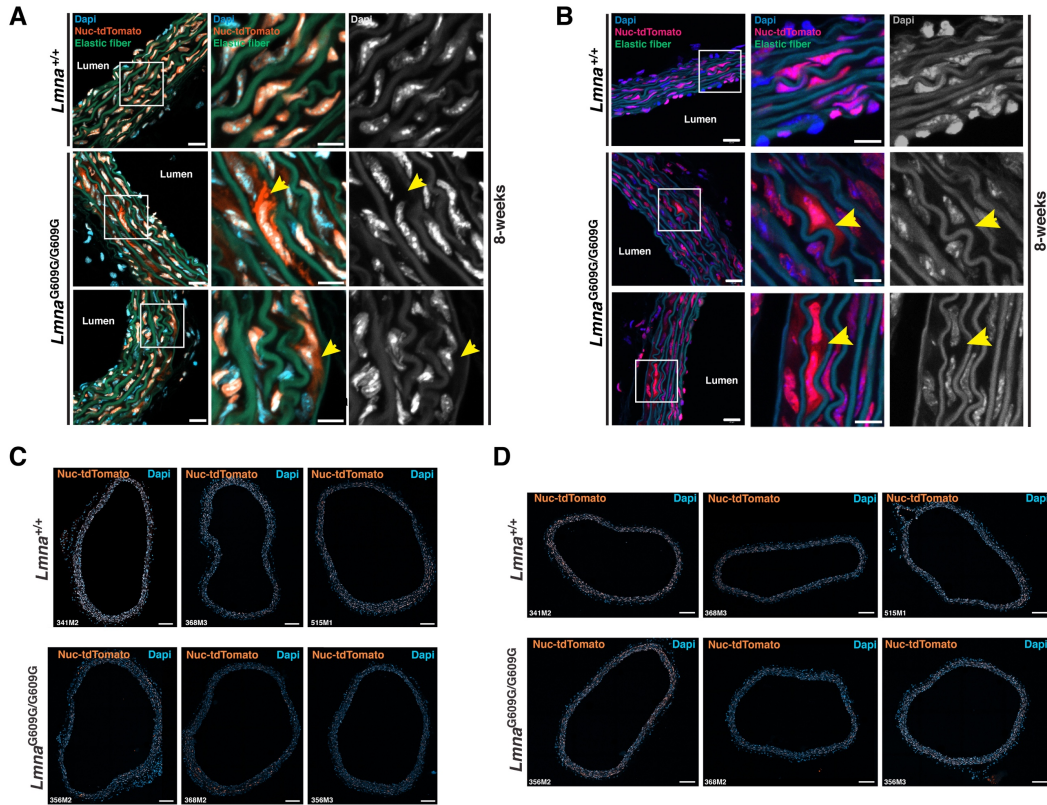

**Fig. S6. NM ruptures in SMCs of the ascending thoracic aorta. (A, B)** Confocal fluorescence microscopy images of the ascending aorta from 8-week-old  $Lmna^{+/+}$  and  $Lmna^{G609G/G609G}$  mice. The boxed regions are shown at higher magnification in the middle and far-right columns. The colored images show Dapi (blue), elastic fibers (green), and Nuc-tdTomato (orange or red). The yellow arrows point to Nuc-tdTomato outside of SMC nuclei. To help visualize the boundaries of nuclei, the Dapi stain (white) is shown by itself in the far-right column. Scale bars: 20  $\mu\text{m}$  (left column); 10  $\mu\text{m}$  (middle column). **(C, D)** Fluorescence microscopy images of cross sections (10- $\mu\text{m}$ -thick) of the upper (C) and lower (D) descending aorta from three 8-week-old  $Lmna^{+/+}$  (top row) and three  $Lmna^{G609G/G609G}$  (bottom row) mice. NM ruptures were quantified in these tissue sections (Fig. 7). The mouse IDs are shown in the bottom left hand corner of each image. Nuc-tdTomato (orange); Dapi (blue). Scale bars, 100  $\mu\text{m}$ .

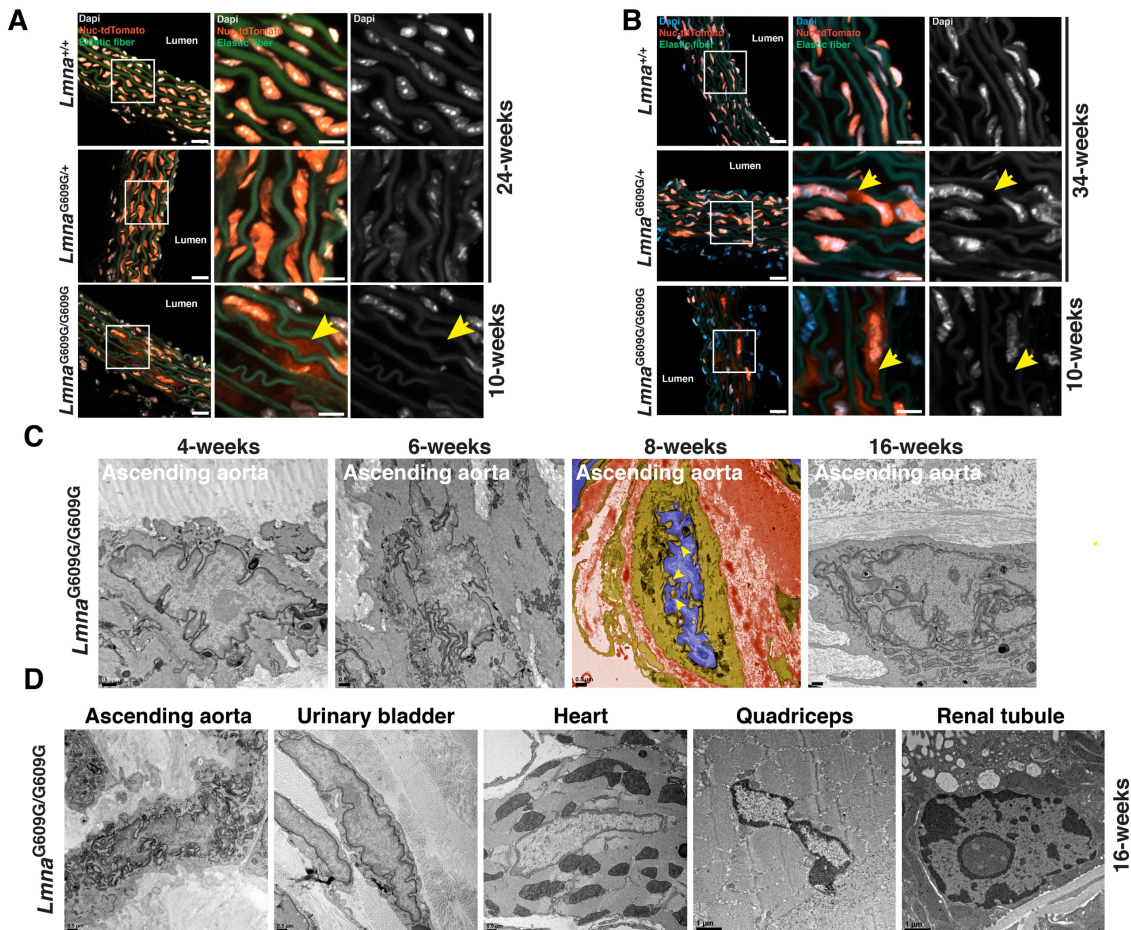

**Fig. S7. NM ruptures and intranuclear membranous tubules in aortic SMCs of *Lmna*<sup>G609G/+</sup> mice.** (A) Confocal fluorescence microscopy images of the ascending aorta from 24-week-old *Lmna*<sup>+/+</sup> and *Lmna*<sup>G609G/+</sup> mice and a 10-week-old *Lmna*<sup>G609G/G609G</sup> mouse. The boxed regions are shown at higher magnification on the right. The colored images show Dapi (*white*), elastic fibers (*green*), and Nuc-tdTomato (*orange*). The yellow arrow (middle column) points to Nuc-tdTomato outside of an SMC nucleus in the *Lmna*<sup>G609G/G609G</sup> mouse. To help visualize the boundaries of nuclei, the Dapi stain (*white*) is shown in the right column. Scale bars: 20  $\mu$ m (left column); 10  $\mu$ m (middle column). (B) Confocal fluorescence microscopy images of the ascending aorta from 34-week-old *Lmna*<sup>+/+</sup> and *Lmna*<sup>G609G/+</sup> mice and a 10-week-old *Lmna*<sup>G609G/G609G</sup> mouse. The boxed regions are shown at higher magnification to the right. Images were generated exactly as described in panel A except that the Dapi signal is colored *blue*. Yellow arrows point to Nuc-tdTomato outside of nucleus in the 34-week-old *Lmna*<sup>G609G/+</sup> mouse and the 10-week-old *Lmna*<sup>G609G/G609G</sup> mouse. Scale bars: 20  $\mu$ m (left column); 10  $\mu$ m (middle column). (C) Representative electron micrographs of SMC nuclei in the ascending aorta from 4-, 6-, 8-, and 16-week-old *Lmna*<sup>G609G/G609G</sup> mice. The image from the 8-week-old mouse was colored to make it easier to identify the cell nucleus (*blue*), cytoplasm (*tan*), and connective tissue (*reddish-brown*). Yellow arrowheads point to intranuclear tubules. Scale bars are shown in the images. (D) Representative electron micrographs of nuclei in the ascending aorta, urinary bladder, heart, quadriceps, and renal tubule from a 16-week-old *Lmna*<sup>G609G/G609G</sup> mouse. Scale bars are shown in the images.

**Table S1. Antibodies used for western blotting and immunohistochemistry.**

| <b>Antibody Description</b> | <b>Species</b> | <b>Source</b>             | <b>Catalog #</b> | <b>Use</b> | <b>Dilution</b> |
|-----------------------------|----------------|---------------------------|------------------|------------|-----------------|
| $\beta$ -actin              | Goat           | Santa Cruz Biotech        | SC1616           | WB, IF     | 1:3000          |
| GFP                         | Rabbit         | ThermoFisher              | A11122           | WB, IF     | 1:1000          |
| Human lamin A               | Mouse          | Millipore                 | MAB3211          | WB, IF     | 1:1500          |
| Lamin A/C                   | Mouse          | Santa Cruz Biotech        | SC376248         | WB, IF     | 1:1500          |
| Lamin B1                    | Goat           | Santa Cruz Biotech        | SC6217           | WB, IF     | 1:1500          |
| Lamin B2                    | Mouse          | Invitrogen                | 332100           | WB, IF     | 1:1000          |
| LAP2 $\beta$                | Mouse          | BD Pharmingen             | 611000           | IF         | 1:2000          |
| Phospho-H2AX                | Mouse          | Millipore                 | 05-636           | WB, IF     | 1:3000          |
| Phospho-STING (Ser365)      | Rabbit         | Cell Signaling Technology | 72971S           | IF         | 1:1000          |
| Phospho-p53(Ser15)          | Rabbit         | Cell Signaling Technology | 9284             | WB, IF     | 1:3000          |
| Tubulin                     | Rat            | Novus Bio                 | NB600-506        | WB         | 1:3000          |
| Anti-rabbit IR800           | Donkey         | LI-COR                    | 926-32213        | WB         | 1:10000         |
| Anti-goat IR800             | Donkey         | LI-COR                    | 926-32214        | WB         | 1:10000         |
| Anti-rat IR800              | Donkey         | ThermoFisher              | SA5-10032        | WB         | 1:5000          |
| Anti-mouse IR800            | Donkey         | ThermoFisher              | SA5-10172        | WB         | 1:5000          |
| Anti-rabbit IR680           | Donkey         | LI-COR                    | 926-32221        | WB         | 1:5000          |
| Anti-rat IR680              | Goat           | LI-COR                    | 925-68076        | WB         | 1:5000          |
| Anti-goat IR680             | Donkey         | LI-COR                    | 926-68074        | WB         | 1:5000          |
| Anti-mouse IR680            | Donkey         | ThermoFisher              | SA5-10170        | WB         | 1:5000          |
| Anti-mouse Alexa 488        | Donkey         | Invitrogen                | A21202           | IF         | 1:2000          |
| Anti-rabbit Alexa 488       | Donkey         | Invitrogen                | A21206           | IF         | 1:2000          |
| Anti-goat Alexa 488         | Donkey         | Invitrogen                | A11055           | IF         | 1:2000          |
| Anti-goat Alexa 555         | Donkey         | Invitrogen                | A21432           | IF         | 1:2000          |
| Anti-rabbit Alexa 555       | Donkey         | Invitrogen                | A31572           | IF         | 1:200           |
| Anti-rabbit Alexa 568       | Donkey         | Invitrogen                | A10042           | IF         | 1:2000          |
| Anti-mouse Alexa 568        | Donkey         | Invitrogen                | A10037           | IF         | 1:2000          |

|                       |        |              |           |    |        |
|-----------------------|--------|--------------|-----------|----|--------|
| Anti-mouse Alexa 647  | Donkey | Invitrogen   | A31571    | IF | 1:2000 |
| Anti-rabbit Alexa 647 | Donkey | Invitrogen   | A31573    | IF | 1:2000 |
| Anti-goat Alexa 647   | Donkey | Invitrogen   | A21447    | IF | 1:2000 |
| Anti-rat Alexa 650    | Donkey | ThermoFisher | SA5-10029 | IF | 1:200  |

**Table S2. Quantitative RT-PCR primers.**

| <b>Gene or transcript</b> | <b>Forward (5'–3')</b>  | <b>Reverse (5'–3')</b>   |
|---------------------------|-------------------------|--------------------------|
| <i>Actb</i>               | GGCTGTATTCCCCTCCATCG    | CCAGTTGGTAACAATGCCATGT   |
| <i>Ppia</i>               | TGAGCACTGGAGAGAAAGGA    | CCATTATGGCGTGTAAAGTCA    |
| <i>Gapdh</i>              | GCACAGTCAAGGCCGAGAAT    | GCCTTCTCCATGGTGGTGAA     |
| <i>Lmna</i>               | CCTATCGAAAGCTGCTGGAG    | CCTGAGACTGGGATGAGTGG     |
| <i>Lmnb1</i>              | CAACTGACCTCATCTGGAAGAAC | TGAAGACTGTGCTTCTCTGAGC   |
| <i>Lmnb2</i>              | GAGGACATTGCCTACAAGTTCAC | TTCCACACAAGGGTTGATG      |
| Lamin C                   | GACAATGAGGATGACGACGAG   | TTAATGAAAAGACTTTGGCATGG  |
| <i>Nup153</i>             | AAGCGAAGTGCTCCTTGTGAGG  | TGGTAGTGGGTTGAAGAGCAGG   |
| <i>Nup98</i>              | CCTCTTGGTACAGGAGCCTTTG  | TTGAGGTGCTGCTGGAGAACAG   |
| Progerin                  | CTGAGTACAACCTGCGCTCA    | AGTTCTGGGAGCTCTGGGCT     |
| <i>Snf7b</i>              | GCAGGACATTGCTGACCAGCAA  | CAAGTTCCTCCAACCTCTGCCATG |
| <i>Sun1</i>               | AGCATCCTAAGCACTCGGT     | TAGATGTCGGGCTGGATCAC     |
| <i>Sun2</i>               | CAGGATTGGAATGGTGGATTA   | AGTGCCGTCTTGGTCTCATAA    |
| <i>Syne1</i>              | CTGCTGCTTATTGGACTCACCT  | GAGGAGGACCGTTGGTATATCTG  |
| <i>Syne2</i>              | CAGGAGTATCCAGAACATTCCCG | AGACTGCTGTGCCTGGATTTCCG  |
| <i>Tmpo</i>               | GGAGTGAATCCTGGTCCCATTG  | GACTGTTGGAAGAGGAGTAGAGG  |
| <i>Vps2</i>               | AACCGAGCCATGAGAGAACTGG  | ACGCACCAGGTCTTTTGCCATG   |
| <i>Vps20</i>              | GAGCAACTGCTCGATAGGACAG  | CCCTCCATCACCTTCATCTCGA   |
| <i>Vps24</i>              | TCAGGTCAAGGAAAGCCGTGAG  | TGCAGAGAACCAGCTACTCGCA   |
| <i>Vps4</i>               | GAGAACCAGAGTGAAGGCAAGG  | TCCACCGTATGTTCCGGCTTCTC  |
| <i>Vps60</i>              | GATGAGAGAGGGTCCTGCTAAG  | CAGGTTGTCTCGCTGTTGCTCA   |

**Table S3. Plasmid constructs.**

| <b>Plasmid name</b>      | <b>Protein</b>            | <b>Constitutive or inducible</b> | <b>Drug selection</b> |
|--------------------------|---------------------------|----------------------------------|-----------------------|
| Prelamin A-pTRIPZ        | Prelamin A                | Inducible                        | Puromycin             |
| Progerin-pTRIPZ          | Progerin                  | Inducible                        | Puromycin             |
| nf-Progerin-pTRIPZ       | Non-farnesylated progerin | Inducible                        | Puromycin             |
| <i>Lmnb1</i> -pTRIPZ     | Lamin B1                  | Inducible                        | Puromycin             |
| nf- <i>Lmnb1</i> -pTRIPZ | Non-farnesylated lamin B1 | Inducible                        | Puromycin             |
| <i>LMNB2</i> -pTRIPZ     | Lamin B2                  | Inducible                        | Puromycin             |
| Prelamin A-pCDH          | Prelamin A                | Constitutive                     | Blasticidin           |
| Progerin-pCDH            | Progerin                  | Constitutive                     | Blasticidin           |
| NLS-CopGFP-pCDH          | Nuclear localized GFP     | Constitutive                     | Blasticidin           |
| NLS-TurboRFP-pCDH        | Nuclear localized RFP     | Constitutive                     | Blasticidin           |
| pLenti6-GFP-KASH2        | GFP-KASH2                 | Constitutive                     | Blasticidin           |
| pLenti6-GFP-KASH2ext     | GFP-KASH2ext              | Constitutive                     | Blasticidin           |

Full unedited gel for Figure 1A.

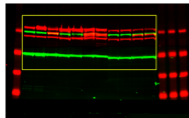

Antibodies  
Lamin A/C  
Lamin B1  
Tubulin

Full unedited gel for Figure 3A.

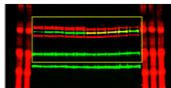

Antibodies  
Lamin A/C  
Lamin B1  
Tubulin  
Actin

Full unedited gel for Figure 3H.

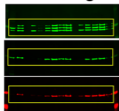

Antibodies  
Lamin A/C  
hLamin A/C  
Lamin B1

Full unedited gel for Figure 4G.

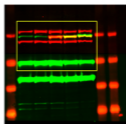

Antibodies  
Lamin A/C  
Lamin B1  
Tubulin  
Actin

Full unedited gel for Figure 5A.

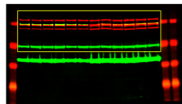

Antibodies  
Lamin A/C  
Lamin B1  
Tubulin  
Actin

Full unedited gel for Figure 5G.

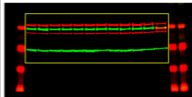

Antibodies  
Lamin A/C  
Lamin B1  
Tubulin

Full unedited gel for Figure S1B.

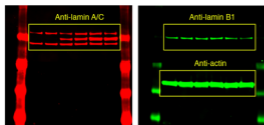

Full unedited gel for Figure S2A.

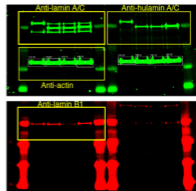

Full unedited gel for Figure S3A.

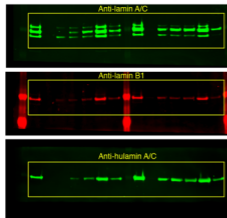

Full unedited gel for Figure S4A.

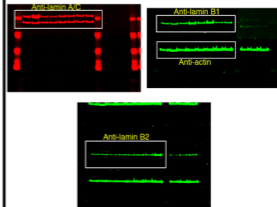



### Full unedited gel for Figure S4B.

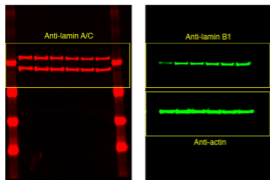

### Full unedited gel for Figure S4F.

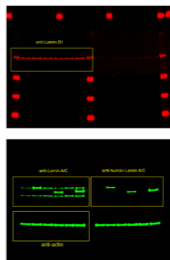

### Full unedited gel for Figure S5D.

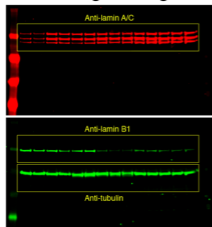

Supplement: jciinsight-6-151515-s186.pdf [file jciinsight-6-151515-s186.pdf]
